# Supplementary material
Source: Elsevier journal article supplement (https://www.sciencedirect.com/science/article/pii/S1885585719302865)
Supplement: mmc1 [file mmc1.pdf]

**Tabla 1**

Días con alerta nivel 2 por calor (alto riesgo) y temperatura mínima y máxima en la Comunidad de Madrid.

| 2013   |      |      | 2015   |      |      | 2016   |      |      | 2017   |      |      |
|--------|------|------|--------|------|------|--------|------|------|--------|------|------|
| Fecha  | Tmín | Tmáx |
| 28-jun | 17,0 | 31,8 | 24-jun | 17,4 | 31,0 | 15-jul | 14,3 | 32,2 | 9-jun  | 20,0 | 32,8 |
| 29-jun | 17,5 | 32,2 | 25-jun | 20,0 | 32,8 | 16-jul | 19,2 | 35,0 | 10-jun | 20,0 | 35,2 |
| 30-jun | 18,4 | 34,5 | 26-jun | 19,5 | 35,3 | 17-jul | 21,6 | 36,6 | 11-jun | 23,0 | 37,0 |
| 5-jul  | 23,2 | 36,8 | 27-jun | 22,0 | 37,2 | 18-jul | 21,4 | 38,0 | 12-jun | 23,3 | 37,0 |
| 6-jul  | 22,2 | 36,2 | 28-jun | 24,0 | 39,0 | 19-jul | 21,0 | 38,2 | 13-jun | 22,0 | 36,6 |
| 7-jul  | 22,8 | 37,2 | 29-jun | 23,0 | 40,0 | 26-jul | 23,8 | 37,8 | 14-jun | 23,4 | 37,4 |
| 8-jul  | 22,6 | 37,2 | 30-jun | 24,0 | 39,6 | 27-jul | 24,6 | 38,4 | 15-jun | 24,2 | 39,5 |
| 9-jul  | 22,5 | 37,5 | 1-jul  | 22,0 | 37,4 | 28-jul | 23,2 | 38,5 | 16-jun | 21,0 | 38,6 |
| 12-jul | 22,2 | 35,4 | 2-jul  | 21,4 | 33,4 | 29-jul | 24,6 | 38,4 | 17-jun | 25,0 | 40,2 |
| 1-ago  | 21,6 | 38,3 | 3-jul  | 21,5 | 37,7 | 30-jul | 24,2 | 36,0 | 18-jun | 24,0 | 39,6 |
|        |      |      | 4-jul  | 22,8 | 36,6 | 31-jul | 20,7 | 34,0 | 19-jun | 22,2 | 35,0 |
|        |      |      | 5-jul  | 24,0 | 37,6 | 5-sept | 22,4 | 39,1 | 20-jun | 21,0 | 34,0 |
|        |      |      | 6-jul  | 22,5 | 40,8 | 6-sept | 22,6 | 39,6 | 21-jun | 22,4 | 36,4 |
|        |      |      | 7-jul  | 22,8 | 38,8 | 7-sept | 22,6 | 38,8 | 22-jun | 23,6 | 37,0 |
|        |      |      | 8-jul  | 24,0 | 38,8 | 8-sept | 17,2 | 33,6 |        |      |      |
|        |      |      | 9-jul  | 21,6 | 39,3 |        |      |      |        |      |      |
|        |      |      | 10-jul | 22,6 | 36,4 |        |      |      |        |      |      |
|        |      |      | 11-jul | 24,4 | 36,8 |        |      |      |        |      |      |
|        |      |      | 12-jul | 22,7 | 37,7 |        |      |      |        |      |      |
|        |      |      | 13-jul | 24,4 | 38,0 |        |      |      |        |      |      |
|        |      |      | 14-jul | 23,2 | 39,4 |        |      |      |        |      |      |
|        |      |      | 15-jul | 23,0 | 40,0 |        |      |      |        |      |      |
|        |      |      | 16-jul | 24,0 | 38,4 |        |      |      |        |      |      |
|        |      |      | 17-jul | 24,8 | 37,0 |        |      |      |        |      |      |
|        |      |      | 18-jul | 22,2 | 33,2 |        |      |      |        |      |      |

|  |  |  |        |      |      |  |  |  |  |  |  |
|--|--|--|--------|------|------|--|--|--|--|--|--|
|  |  |  | 19-jul | 22,4 | 33,8 |  |  |  |  |  |  |
|  |  |  | 20-jul | 24,6 | 36,2 |  |  |  |  |  |  |
|  |  |  | 4-ago  | 23,0 | 35,5 |  |  |  |  |  |  |

Abreviaturas: Tmin: temperatura mínima; Tmax: Temperatura máxima

## **PIES DE FIGURA**

**Figura 1.** Razón de tasas de incidencia (RTI) de infarto agudo de miocardio con elevación del segmento ST (IAMCEST), ajustadas por tendencia y estacionalidad, comparando los días de alerta por ola de calor con los días sin alerta en los meses de junio a septiembre, desde el día de la alerta (lag0) hasta los cuatro días posteriores (lag1 a lag4), en función del género y grupo de edad.

**Figura 2.** Razón de tasas de incidencia (RTI) de infarto agudo de miocardio con elevación del segmento ST (IAMCEST) para la temperatura máxima respecto la temperatura de mínima incidencia (18 °C), por género y grupo de edad.
